# Supplementary material for: The repeatability and consistency of different methods for measuring the volume parameters of the primary rectal cancer on diffusion weighted images
Source: Front Oncol. 2023 Mar 9;13:993888. doi: 10.3389/fonc.2023.993888 (PMC10034158; doi:10.3389/fonc.2023.993888)
Supplement: Supplementary file 1 [file Table_1.xls]

## Sheet: reader1
GTV patient	10%GTV（CM3）	20%GTV(CM3)	30%GTV（CM3）	40%GTV(CM3)	50%GTV（CM3）	60%GTV(CM3)	70%GTV（CM3）	80%GTV(CM3)	90%GTV（CM3）		semi-automatic time（s）	manual delineation GTV(CM3)	manual delineation time(s)
1	58.48	47.32	29.62	13.37	4.749	2.035	0.712	0.305	0.102		48	20.76	102
2	32.46	20.18	10.28	4.783	2.341	0.882	0.611	0.305	0.136		30	19.54	83
3	52.99	45.42	37.79	30.09	22.86	15.91	10.01	4.037	0.848		43	39.96	78
4	43.35	23.95	15.38	10.46	6.345	2.956	1.594	0.498	0.199		22	23.82	66
5	50.04	35.35	25.17	15.81	9.6	5.055	2.51	0.848	0.305		26	21.71	79
6	87.64	59.86	39.96	23.4	8.799	2.728	0.845	0.346	0.192		19	50.68	74
7	32.89	26.28	19.66	14.19	8.949	4.665	1.809	0.524	0.286		14	18.42	42
8	25.3	18.9	13.82	10.12	7.101	4.534	1.915	0.572	0.162		12	16.96	34
9	60.71	50.33	39.11	28.45	19.04	11.02	4.404	1.369	0.073		17	35.8	60
10	46.2	38.54	30.77	21.1	11.77	4.41	1.391	0.475	0.068		14	20.39	85
11	20.01	17.47	14.28	11.09	8.413	6.378	4.206	1.662	0.17		14	13.6	34
12	26.29	18.56	11.53	7.429	4.308	2.273	1.255	0.237	0.068		12	12.18	65
13	45.52	33.4	23.18	13.69	6.061	3.053	1.712	0.78	0.231		39	15.36	88
14	20.59	11.94	6.242	3.426	1.73	1.018	0.339	0.102	0.068		10	3.358	33
15	55.42	37.66	23.18	11.39	4.204	1.274	0.446	0.223	0.112		22	45.43	84
16	16.55	15.13	12.69	9.024	6.513	4.376	2.748	1.594	0.611		16	11.23	32
17	45.27	27.78	13.55	5.32	2.069	0.542	0.197	0.049	0.049		21	21.57	61
18	24.19	21.65	17.97	14.82	11.9	8.508	5.64	2.964	0.717		6	20.93	45
19	28.94	22.37	15.52	9.976	7.132	5.017	3.369	1.969	0.715		47	22.74	69
20	32.57	26.49	20.39	13.64	9.363	5.597	2.782	0.916	0.305		19	19.51	59
21	16.35	15.47	13.5	10.52	7.802	5.97	4.478	2.782	0.882		29	9.702	33
22	22.63	18.62	12.62	7.768	5.088	2.917	1.493	0.645	0.136		10	12.28	33
23	33.44	26.38	18.98	12.95	8.903	5.666	2.833	0.883	0.221		8	23.85	46
24	26.02	20.59	14.48	9.381	5.328	2.942	1.602	0.817	0.392		18	16.59	26
25	24.12	15.5	7.904	3.901	2.476	1.628	0.882	0.17	0.102		58	21.27	77
26	26.61	20.66	15.69	12.4	8.412	5.313	1.918	0.639	0.098		20	17.91	39
27	63.94	47.02	32.41	20.51	11.34	4.61	1.383	0.369	0.138		43	31.16	121
28	29.3	18.13	8.243	4.176	2.237	1.189	0.563	0.203	0.078		26	9.917	28
29	84.13	73.1	58.01	42.03	26.77	13.54	5.055	1.018	0.305		32	54.55	92
30	54.73	38.46	25.28	16.21	10.71	7.067	4.366	2.166	0.337		13	36.69	36
31	47.78	34.41	22.21	15.42	9.893	5.683	2.684	1.052	0.263		19	33.01	58
32	43.08	32.4	23.95	13.67	6.31	2.748	1.187	0.509	0.102		12	32.23	43
33	35.59	22.83	12.65	7.497	3.426	1.594	0.645	0.373	0.068		14	27.51	40
34	45.72	28.78	17.72	11.08	5.765	2.115	0.655	0.302	0.176		15	27.16	42
35	46.44	31.48	21.3	13.64	7.836	4.206	2.137	0.814	0.136		12	31.56	52
36	58.82	42.6	27.79	17.52	8.17	3.192	1.216	0.266	0.076		10	38.76	58
37	71.7	46.47	26.6	13.09	5.678	1.733	0.687	0.179	0.06		14	55.99	98
38	45.19	34.23	27.17	20.46	13.7	8.922	4.614	2.035	0.475		10	30.43	35
39	27.4	17.24	10.25	5.765	3.114	1.085	0.338	0.16	0.053		10	14.75	30
40	57.6	43.59	33.89	27.21	21.41	16.45	10.82	5.156	1.357		13	44.27	45
41	33.93	20.46	14.11	9.144	4.895	2.55	1.36	0.51	0.136		10	27.64	33

## Sheet: reader1-2
GTV patient	10%GTV（CM3）	20%GTV(CM3)	30%GTV（CM3）	40%GTV(CM3)	50%GTV（CM3）	60%GTV(CM3)	70%GTV（CM3）	80%GTV(CM3)	90%GTV（CM3）		semi-automatic time（s）	manual delineation GTV(CM3)	manual delineation time(s)
1	75.68	51.94	29.92	13.37	4.749	2.035	0.712	0.305	0.102		22	19.91	47
2	38.67	20.32	10.08	4.749	2.341	0.882	0.611	0.305	0.136		18	17.23	49
3	84.57	56.86	40.3	28.9	21.3	15.23	9.872	4.037	0.848		24	37.74	50
4	49.26	24.22	15.35	10.46	6.345	2.956	1.594	0.498	0.199		16	27.54	38
5	63.78	40.4	26.39	15.81	9.6	5.055	2.51	0.848	0.305		25	40.28	71
6	73.96	52.37	37.12	23.02	8.683	2.728	0.845	0.346	0.192		22	66.16	60
7	48.08	32.37	23.04	16.14	9.616	4.903	1.856	0.524	0.286		17	22.99	43
8	53.54	22.47	14.18	10.14	7.101	4.534	1.915	0.572	0.162		10	22.75	30
9	75.45	53.31	39.42	28.45	19.04	11.02	4.404	1.369	0.073		27	39.68	46
10	69.64	47.26	35.62	22.69	11.87	4.41	1.391	0.475	0.068		14	20.9	55
11	57.33	34.16	25.92	18.56	11.81	7.327	4.444	1.662	0.17		20	20.05	27
12	38.94	23.78	13.03	7.938	4.308	2.273	1.255	0.237	0.068		20	13.13	59
13	35.07	23.41	16.1	9.947	5.505	2.961	1.712	0.833	0.231		17	28.22	58
14	29.82	15.16	7.158	3.46	1.73	1.018	0.339	0.102	0.068		13	5.869	24
15	58.6	37.66	23.18	11.39	4.204	1.274	0.446	0.223	0.112		16	45.5	49
16	49.97	31.72	19.06	10.92	6.92	4.376	2.748	1.594	0.611		10	15.88	32
17	56.15	29.16	13.55	5.32	2.069	0.542	0.197	0.049	0.049		15	18.93	44
18	50.62	33.32	21.65	15.44	11.9	8.508	5.64	2.964	0.717		11	17.67	32
19	32.01	22.55	15.27	9.976	7.132	5.017	3.369	1.969	0.715		17	19.46	30
20	41.28	26.8	20.35	13.64	9.363	5.597	2.782	0.916	0.305		10	18.73	49
21	30.94	21.91	16.76	11.87	8.074	6.004	4.512	2.782	0.882		11	8.311	28
22	39.76	26.7	14.52	8.243	5.156	2.951	1.493	0.645	0.136		12	15.5	26
23	55.44	34.1	21.67	13.35	8.94	5.666	2.833	0.883	0.221		12	30.08	35
24	33.76	22.09	15.04	9.577	5.393	2.942	1.602	0.817	0.392		13	21.54	40
25	38.88	20.25	8.684	4.037	2.476	1.628	0.882	0.17	0.102		10	7.87	25
26	41.37	26.56	18.59	13.13	8.51	5.313	1.918	0.639	0.098		15	23.2	47
27	73.99	44.81	31.58	20.42	11.34	4.61	1.383	0.369	0.138		15	25.12	46
28	34.33	15.94	7.743	4.176	2.237	1.189	0.563	0.203	0.078		12	12.42	37
29	120	84.64	61.47	43.59	26.94	13.54	5.055	1.018	0.305		17	68.15	63
30	70.95	41.92	25.6	16.33	10.71	7.067	4.366	2.166	0.337		12	31.15	53
31	63.04	38.62	23.52	15.52	9.893	5.683	2.684	1.052	0.263		16	32.72	64
32	63.91	36.43	25.14	14.08	6.378	2.748	1.187	0.509	0.102		12	35.31	41
33	46.64	26.26	12.69	7.294	3.358	1.594	0.645	0.373	0.068		10	22.05	43
34	59.09	29.4	17.77	11.08	5.765	2.115	0.655	0.302	0.176		12	32.4	56
35	63.71	32.09	21.37	13.64	7.836	4.206	2.137	0.814	0.136		13	32.06	53
36	86.11	48.3	31.54	18.01	8.36	3.268	1.254	0.266	0.076		12	27.7	59
37	92.47	46.71	26.63	13.09	5.678	1.733	0.687	0.179	0.06		14	55.68	106
38	58.72	37.11	27.21	20.46	13.7	8.922	4.614	2.035	0.475		15	35.04	44
39	41.92	18.6	10.43	5.765	3.114	1.085	0.338	0.16	0.053		6	14.5	29
40	61.98	43.59	33.96	27.21	21.41	16.45	10.82	5.156	1.257		11	50.38	47
41	55.38	22.27	14.14	9.144	4.895	2.55	1.36	0.51	0.136		11	32.97	37

## Sheet: reader2
GTV patient	10%GTV（CM3）	20%GTV(CM3)	30%GTV（CM3）	40%GTV(CM3)	50%GTV（CM3）	60%GTV(CM3)	70%GTV（CM3）	80%GTV(CM3)	90%GTV（CM3）		manual delineation GTV(CM3)
1	50.1	42.74	28.12	13.33	4.749	2.035	0.712	0.305	0.102		17.5
2	48.71	25.48	10.52	4.783	2.341	0.882	0.611	0.305	0.136		14.77
3	90.1	67.07	49.15	33.45	23.31	15.91	10.01	4.037	0.848		26.72
4	41.26	23.29	15.18	10.36	6.311	2.956	1.594	0.498	0.199		22.12
5	87.11	54.21	31.21	16.22	9.668	5.055	2.51	0.848	0.305		20.29
6	77.77	55.41	38.61	23.09	8.683	2.728	0.845	0.346	0.192		40.65
7	47.22	37.08	28.42	20.09	11.23	5.236	1.904	0.524	0.286		17.57
8	45.93	20.8	14.09	10.12	7.101	4.534	1.915	0.572	0.162		10.52
9	88.12	61.55	43.41	29.31	19.08	11.02	4.404	1.369	0.073		27.26
10	69.58	49.22	36.77	23	11.87	4.41	1.391	0.475	0.068		33.38
11	126.5	69.37	44.81	28.19	14.89	7.735	4.444	1.662	0.17		22.42
12	47.26	28.83	13.54	7.938	4.308	2.273	1.255	0.237	0.068		17.13
13	46.36	32.15	22.53	13.51	6.061	3.053	1.527	0.78	0.231		22.85
14	32.84	17.2	7.429	3.596	1.764	1.018	0.339	0.102	0.068		4.681
15	58.46	37.66	23.18	11.39	4.204	1.274	0.446	0.223	0.112		30.92
16	23.68	19.88	14.89	9.973	6.852	4.376	2.748	1.594	0.611		6.791
17	69.84	33.54	14.23	5.32	2.069	0.542	0.197	0.049	0.049		26.42
18	35.9	24.81	18.45	14.91	11.9	8.508	5.64	2.964	0.717		9.817
19	65.6	33.03	16.92	9.976	7.132	5.017	3.369	1.969	0.715		14.87
20	36.03	28.02	21.51	14.11	9.397	5.597	2.782	0.916	0.305		12.78
21	25.65	18.69	15.3	10.99	7.768	5.733	4.444	2.782	0.882		6.713
22	34.4	25.44	15.88	9.058	5.19	2.951	1.493	0.645	0.136		8.681
23	53.27	34.1	21.56	13.39	8.94	5.666	2.833	0.083	0.221		14.24
24	50.04	27.59	16.51	9.544	5.328	2.942	1.602	0.817	0.392		9.609
25	20.15	14.76	7.802	3.901	2.476	1.828	0.882	0.17	0.102		6.35
26	28.43	20.51	15.5	12.45	8.412	5.313	1.918	0.639	0.098		13.43
27	77.49	47.71	32.68	20.65	11.34	4.61	1.383	0.369	0.138		36.4
28	39.6	20.98	8.556	4.176	2.237	1.189	0.563	0.203	0.078		16.3
29	148.5	100.1	72.83	48.21	27.68	13.57	5.055	1.018	0.305		52.73
30	59.94	38.18	25.03	16.17	10.71	7.067	4.366	2.166	0.337		11.61
31	105.51	62.88	29.26	16.21	9.998	5.683	2.684	1.052	0.263		15.31
32	46.71	32.09	23	13.03	6.14	2.748	1.187	0.509	0.102		13.12
33	48.65	23.1	12.52	7.26	3.324	1.594	0.645	0.373	0.068		9.77
34	84.79	37.01	18.73	11.2	5.815	2.14	0.655	0.302	0.176		22.27
35	78.63	39.69	23.27	14.15	8.108	4.41	2.205	0.882	0.136		20.56
36	150.7	71.36	41.88	22.19	9.918	3.762	1.368	0.38	0.076		36.25
37	154.5	63.39	28.33	13.21	5.768	1.733	0.687	0.179	0.06		28.33
38	148.8	61.81	35.31	23.14	14.21	9.058	4.681	2.103	0.475		25.85
39	48.1	19.7	10.5	5.765	3.114	1.085	0.338	0.16	0.053		17.09
40	104.7	54.72	38.91	28.87	21.58	16.45	10.82	5.156	1.357		35.61
41	43.99	21.25	14.35	9.144	4.895	2.55	1.36	0.51	0.136		16.61
