# Supplementary material for: The repeatability and consistency of different methods for measuring the volume parameters of the primary rectal cancer on diffusion weighted images
Source: Front Oncol. 2023 Mar 9;13:993888. doi: 10.3389/fonc.2023.993888 (PMC10034158; doi:10.3389/fonc.2023.993888)
Supplement: Supplementary file 2 [file Table_2.xlsx]

## Sheet: reader1
GTV patient	10%GTV（CM3）	20%GTV(CM3)	30%GTV（CM3）	40%GTV(CM3)	50%GTV（CM3）	60%GTV(CM3)	70%GTV（CM3）	80%GTV(CM3)	90%GTV（CM3）		semi-automatic time（s）	manual delineation GTV(CM3)	manual delineation time(s)
1	58.28	43.18	24.42	12.79	5.394	2.137	1.052	0.339	0.102		43	19.78	120
2	23.14	17.81	11.09	6.412	3.426	1.696	0.814	0.441	0.237		25	14.86	64
3	52.85	44.44	35.21	27.14	19.68	13.47	8.413	3.664	1.052		38	36.81	72
4	32.49	19.23	13.89	9.7	6.345	2.923	1.362	0.299	0.066		23	21.72	61
5	48.58	32.36	21.47	13.16	8.617	4.614	2.307	1.086	0.237		19	21.34	57
6	73.96	54.64	39.58	27.24	14.98	4.688	1.191	0.538	0.231		20	48.49	64
7	30.04	22.8	16.47	12.04	7.045	3.618	1.809	0.428	0.143		14	17.9	38
8	25.73	18.96	13.6	10.24	7.192	4.901	2.581	0.867	0.291		8	14.93	31
9	60.86	48.04	35.79	26.13	18.17	11.44	5.48	2.182	0.319		16	32.56	59
10	42	34.64	26.29	16.93	9.025	3.799	1.221	0.339	0.102		10	16.62	53
11	23.47	21.34	15.71	11.33	7.836	5.462	3.087	1.289	0.237		14	12.79	31
12	22.97	16.62	10.55	7.124	5.122	2.951	1.764	0.678	0.17		17	11.57	39
13	27.06	20.31	13.97	8.975	5.32	2.961	1.527	0.879	0.231		21	10.87	84
14	16.66	11.09	5.394	2.951	1.527	0.78	0.339	0.17	0.068		13	1.866	22
15	50.09	31.64	18.59	7.767	2.456	0.958	0.381	0.195	0.121		19	40.16	74
16	19.3	15.16	9.77	7.124	4.546	3.053	2.103	0.916	0.17		10	8.956	34
17	47.38	33.64	17.04	9.555	4.581	1.576	0.345	0.099	0.049		14	20.49	51
18	22.27	19.36	15.92	12.19	9.847	6.357	3.872	1.147	0.191		20	18.54	42
19	28.02	20.29	12.44	8.43	5.819	4.098	2.64	1.269	0.263		14	20.98	34
20	30.84	25.88	18.86	12.21	8.684	5.292	2.985	1.187	0.373		10	17.69	59
21	16.69	15.67	12.89	10.04	7.599	5.767	3.867	2.171	0.543		27	9.363	30
22	22.76	17.54	10.08	6.344	3.799	2.51	1.357	0.509	0.102		10	10.58	32
23	34.07	23.62	15.71	10.82	6.917	4.084	1.656	0.625	0.074		8	22.59	40
24	22.16	17.72	11.93	7.321	3.791	1.994	1.177	0.49	0.163		14	13.24	18
25	13.98	8.345	4.444	2.85	1.798	0.95	0.305	0.102	0.034		36	19.05	64
26	25.24	20.17	15.05	12.15	9.297	6.49	3.591	1.181	0.394		13	15.59	38
27	62.42	41.48	25.82	15.44	7.56	3.043	1.06	0.277	0.092		47	42.86	106
28	30.16	18.9	9.651	5.177	2.925	1.705	1.048	0.375	0.109		19	8.493	39
29	74.8	61.47	46.75	32.84	22.22	12.82	4.885	0.984	0.305		30	51.63	72
30	49.48	32.89	20.28	13.02	8.499	5.272	3.184	1.268	0.078		13	32.08	45.48
31	46.73	29.41	18.31	12.1	7.788	3.946	2.052	0.947	0.263		13	32.41	65
32	49.6	32.91	22.36	12.82	5.903	2.816	1.425	0.678	0.204		15	32.84	43
33	32.53	18.66	10.99	7.056	3.46	1.798	0.984	0.373	0.136		13	19.61	43
34	52.01	30.16	18.43	10.42	5.539	1.813	0.705	0.252	0.101		15	32.12	53
35	35.08	24.32	16.01	10.45	6.615	4.105	2.442	0.814	0.2		12	28.82	42
36	55.86	43.24	31.16	20.44	10.91	5.7	2.318	0.836	0.304		10	35.95	50
37	61.57	38.1	21.64	11.3	5.021	1.584	0.508	0.149	0.06		17	44.53	69
38	42.1	30.8	22.66	16.25	11.13	7.09	3.698	1.323	0.305		13	28.53	40
39	25.34	15.91	9.128	5.338	3.007	1.103	0.409	0.142	0.071		10	12.3	29
40	54.79	40.74	32.09	25.44	20.59	15.77	10.48	5.326	1.323		10	39.52	43
41	32.7	19.24	13.53	9.076	5.439	2.991	1.666	0.782	0.204		10	26.48	33

## Sheet: reader1-2
GTV patient	10%GTV（CM3）	20%GTV(CM3)	30%GTV（CM3）	40%GTV(CM3)	50%GTV（CM3）	60%GTV(CM3)	70%GTV（CM3）	80%GTV(CM3)	90%GTV（CM3）		semi-automatic time（s）	manual delineation GTV(CM3)	manual delineation time(s)
1	75.99	45.05	24.29	12.82	5.428	2.137	1.052	0.339	0.102		26	32.57	43
2	39.59	18.83	10.89	6.412	3.426	1.696	0.814	0.441	0.237		17	16.33	33
3	98.55	53.97	35.04	25.24	18.69	13.33	8.379	3.664	1.052		22	39.15	49
4	37.67	19.37	13.89	9.7	6.345	2.923	1.362	0.299	0.066		12	24.28	43
5	65.95	36.09	22.49	13.16	8.617	4.614	2.307	1.086	0.237		16	28.78	49
6	81.26	52.91	39	27.09	14.95	4.688	1.191	0.538	0.231		16	61.9	49
7	45.32	27.85	18.66	12.95	7.188	3.665	1.809	0.428	0.143		13	23.99	37
8	63.97	23.61	14.04	10.24	7.192	4.901	2.581	0.867	0.291		10	23.77	28
9	75.75	49.14	35.79	26.13	18.17	11.44	5.48	2.182	0.319		17	51	45
10	59.7	39.32	28.73	17.64	9.024	3.799	1.221	0.339	0.102		15	38.49	52
11	56.58	35.18	21.44	14.21	9.058	5.699	3.121	1.289	0.237		10	18.37	23
12	41.59	21.17	11.91	7.667	5.122	2.951	1.764	0.678	0.17		13	20.69	45
13	37.24	22.35	14.85	9.392	5.32	2.961	1.527	0.879	0.231		17	37	56
14	35.52	16.59	6.344	3.053	1.527	0.78	0.339	0.17	0.068		10	3.053	16
15	53.15	31.64	18.59	7.767	2.456	0.958	0.381	0.195	0.121		15	39.59	49
16	48.41	20.73	10.72	7.226	4.546	3.053	2.103	0.916	0.17		7	15.15	28
17	68.61	36.55	17.58	9.555	4.581	1.576	0.345	0.099	0.049		16	23.79	40
18	51.1	30.74	18.36	12.38	9.847	6.357	3.872	1.147	0.191		13	17.48	32
19	36.34	20.21	12.11	8.43	5.891	4.098	2.64	1.269	0.263		10	15.87	30
20	53.33	27.27	19.13	12.55	8.684	5.292	2.985	1.187	0.373		10	25.44	40
21	35.48	22.22	15.4	10.92	7.87	5.801	3.867	2.171	0.543		9	9.906	25
22	44.61	21.71	10.65	6.411	3.867	2.51	1.357	0.509	0.102		12	12.4	27
23	53.2	25.86	16	10.82	6.917	4.084	1.656	0.625	0.074		13	21.93	31
24	37.98	21.15	12.13	7.321	3.791	1.994	1.177	0.49	0.163		14	16.02	39
25	24.7	8.854	4.444	2.85	1.798	0.95	0.305	0.102	0.034		10	7.497	23
26	56.52	30.4	19.33	12.94	9.297	6.493	3.591	1.181	0.394		13	21.96	35
27	82.8	42.27	25.68	15.49	7.56	3.043	1.06	0.277	0.092		11	21.39	31
28	41.78	18.88	9.729	5.381	2.972	1.705	1.048	0.375	0.109		16	21.68	36
29	124.2	74.09	50.88	34.09	22.42	12.89	4.885	0.984	0.305		13	61.84	59
30	57.64	32.83	20	13.02	8.499	5.272	3.184	1.268	0.078		11	32.82	41
31	56.78	30.36	18.42	12.1	7.788	3.946	2.052	0.947	0.263		10	30.14	62
32	70.09	35.25	22.97	12.96	5.903	2.816	1.425	0.678	0.204		12	26.19	39
33	45.15	19.4	11.09	7.124	3.46	1.798	0.984	0.373	0.136		10	14.76	39
34	74.12	33.16	18.98	10.55	5.564	1.813	0.705	0.252	0.101		12	29.45	55
35	69.51	27.07	16.18	10.52	6.615	4.105	2.442	0.814	0.204		11	22.29	45
36	97.05	60.42	34.88	22.15	11.29	6.08	2.698	0.988	0.38		12	21.32	38
37	77.44	38.55	21.64	11.3	5.021	1.584	0.508	0.149	0.06		13	50.96	89
38	68.32	36.54	23.81	16.72	11.33	7.158	3.698	1.323	0.305		13	34.33	38
39	47.4	16.76	9.182	5.338	3.007	1.103	0.409	0.142	0.071		7	13.47	27
40	67.91	40.91	32.09	25.44	20.59	15.77	10.48	5.326	1.323		11	47.02	49
41	76.18	21.21	13.6	9.076	5.439	2.991	1.666	0.782	0.204		10	27.64	35

## Sheet: reader2
GTV patient	10%GTV（CM3）	20%GTV(CM3)	30%GTV（CM3）	40%GTV(CM3)	50%GTV（CM3）	60%GTV(CM3)	70%GTV（CM3）	80%GTV(CM3)	90%GTV（CM3）		manual delineation GTV(CM3)
1	63.91	43.76	24.22	12.79	5.394	2.137	1.052	0.339	0.102		19.44
2	33.08	19.91	11.26	6.412	3.426	1.696	0.814	0.441	0.237		11.52
3	79.58	55.91	39.52	27	19.47	13.43	8.413	3.664	1.052		25.02
4	30.79	19.23	13.89	9.7	6.345	2.923	1.362	0.299	0.066		19.73
5	67.13	38.64	23.17	13.23	8.617	4.614	2.307	1.086	0.237		20.42
6	77.08	55.37	40.92	27.86	14.95	4.688	1.191	0.538	0.231		43.65
7	32.89	24.71	18.28	13.38	7.807	3.856	1.904	0.428	0.143		16.44
8	47.92	21.11	13.72	10.24	7.192	4.901	2.581	0.867	0.291		10.13
9	80.77	56.74	39.54	27.57	18.29	11.44	5.48	2.182	0.319		30.81
10	53.73	40.95	29.62	17.91	9.204	3.799	1.221	0.339	0.102		24.69
11	65.81	48.85	31.82	19.64	10.79	5.869	3.121	1.289	0.237		19.62
12	54.65	25.48	12.59	7.667	5.122	2.951	1.764	0.678	0.17		14.42
13	46.91	31.97	21.74	13.51	6.107	3.1	1.527	0.879	0.231		17.98
14	19.06	11.84	6.004	3.053	1.594	0.78	0.339	0.17	0.068		3.291
15	52.89	31.64	18.59	7.767	2.456	0.958	0.381	0.195	0.121		30.52
16	21.24	16.72	10.41	7.192	4.546	3.053	2.103	0.916	0.17		6.572
17	58.47	39.75	18.72	9.753	4.63	1.576	0.345	0.099	0.049		24.69
18	35.95	23.28	16.83	12.28	9.847	6.357	3.872	1.147	0.191		11.49
19	46.23	21.89	12.44	8.43	5.819	4.098	2.64	1.269	0.263		12.56
20	45.97	28.36	19.74	12.59	8.684	5.292	2.985	1.187	0.373		10.668
21	14.21	13.43	11.06	9.159	7.192	5.665	3.867	2.171	0.543		6.44
22	31.11	20.49	11.47	6.886	3.935	2.51	1.357	0.509	0.102		7.013
23	47.72	26.93	16.15	10.82	6.917	4.084	1.656	0.625	0.074		13.52
24	26.7	19.28	12.03	7.321	3.791	1.994	1.177	0.49	0.163		8.36
25	25.92	8.922	4.444	2.85	1.798	0.95	0.305	0.102	0.034		4.749
26	36.4	22.73	15.64	12.1	9.297	6.493	3.591	1.181	0.394		14.31
27	73.25	42.78	25.95	15.44	7.56	3.043	1.06	0.277	0.092		35.76
28	51.04	19.8	9.51	5.177	2.925	1.705	1.048	0.375	0.109		13.28
29	120.1	82.67	55.46	35.69	22.49	12.82	4.885	0.984	0.305		44.37
30	56.55	32.19	19.96	13	8.499	5.272	3.184	1.268	0.078		11
31	60.93	34.89	18.89	12.1	7.788	3.946	2.052	0.947	0.263		16.32
32	59.67	38.57	24.7	13.4	6.038	2.816	1.425	0.678	0.204		14.49
33	49.05	20.12	10.99	7.022	3.46	1.798	0.984	0.373	0.136		7.12
34	70.29	34.52	19.16	10.52	5.564	1.813	0.705	0.252	0.101		21.07
35	76.09	31.65	18.79	11.43	6.751	4.139	2.442	0.814	0.204		18.24
36	108	67.18	37.47	22.88	11.63	6.422	2.888	1.102	0.456		32.47
37	70.47	37.24	21.55	11.3	5.021	1.584	0.508	0.149	0.06		27.41
38	106.7	49.32	27.17	17.57	11.36	7.158	3.698	1.322	0.305		24.17
39	69.82	18.77	9.324	5.338	3.007	1.103	0.409	0.142	0.071		15.92
40	109.7	53.12	35.82	26.39	20.59	15.77	10.48	5.326	1.323		34.82
41	47.83	19.44	13.56	9.078	5.439	2.991	1.666	0.782	0.204		14.23
